# Supplementary material
Source: publisher figshare collection journal article supplement (https://plos.figshare.com/articles/dataset/_/122577)
Supplement: Supplementary file 1 [file 1]

Archive with 11 entries (11 files):
- Figure_S1.doc
- Figure_S2.doc
- Figure_S3.doc
- Figure_S4.doc
- Figure_S5.doc
- Figure_S6.doc
- Figure_S7.doc
- Figure_S8.doc
- Table_S1.pdf
- Table_S2.pdf
- Table_S3.pdf
