# Supplementary material
Source: publisher figshare collection journal article supplement (https://plos.figshare.com/articles/dataset/_/122577)
Supplement: Supplementary file 1 [file 1 › Table_S1.pdf]

**Table S1: Specimens of *Amanita* and close relatives used in to construct phylogeny**

| Species                               | Symbiotic (SYM)/ Free-living (FL**) | Herbarium ID     | Collection Location*         | GenBank Accession #s |          |          |          |
|---------------------------------------|-------------------------------------|------------------|------------------------------|----------------------|----------|----------|----------|
|                                       |                                     |                  |                              | nucLSU               | nucSSU   | mtLSU    | mtSSU    |
| <i>Amanita abrupta</i>                | SYM                                 | BW_HP_101***     | United States, Massachusetts | HQ539660             | HQ539768 | HQ539978 | HQ539871 |
| <i>A. afrospinosa</i>                 | SYM                                 | RET 347-1        | Zimbabwe, Harare             | HQ539666             | HQ539774 | HQ539981 | HQ539877 |
| <i>A. altipes</i>                     | SYM                                 | Yang 2431        | China, Sichuan               | HQ539667             | HQ539775 | HQ539982 | HQ539878 |
| <i>A. amanitoides</i>                 | SYM                                 | RET 344-9        | Zambia, Copper Belt Province | HQ539668             | HQ539983 | HQ539879 |          |
| <i>A. armillariiformis</i>            | FL                                  | RET 266-8        | United States, Colorado      | HQ539669             | HQ539776 | HQ539984 | HQ539880 |
| <i>A. sp-Arora-01-560</i>             | SYM                                 | RET 345-5        | Zambia, Copper Belt Province | HQ539698             | HQ539802 | HQ540012 | HQ539909 |
| <i>A. atkinsoniana</i>                | SYM                                 | RET 301-1        | United States, Connecticut   | HQ539670             | HQ539777 | HQ539985 | HQ539881 |
| <i>A. banningiana</i>                 | SYM                                 | BW_Shopkins#16   | United States, New Jersey    | HQ539671             | HQ539778 | HQ539986 | HQ539882 |
| <i>A. brunnescens</i>                 | SYM                                 | BW_HP12**        | United States, Massachusetts | HQ539674             | HQ539780 | HQ539989 | HQ539885 |
| <i>A. affin. brunnescens</i>          | SYM                                 | BW_HF 10C***     | United States, Massachusetts | HQ539661             | HQ539769 | HQ539872 |          |
| <i>A. brunneolocularis</i>            | SYM                                 | NY 460913        | Costa Rica, San José         | HQ539673             | HQ539779 | HQ539988 | HQ539884 |
| <i>A. cecilieae</i> sensu auct. amer. | SYM                                 | BW_HF071106-1*** | United States, MA            | HQ539675             |          | HQ539990 | HQ539886 |
| <i>A. chlorinosma</i>                 | SYM                                 | RET 328-6        | United States, New York      | HQ539676             | HQ539781 | HQ539991 | HQ539887 |
| <i>A. cinereoconia</i>                | SYM                                 | BW_PSF           | United States, New Hampshire | HQ539677             |          |          | HQ539888 |
| <i>A. cinereopannosa</i>              | SYM                                 | RET 319-8        | United States, Maine         | HQ539678             | HQ539782 | HQ539992 | HQ539889 |

|                                      |     |                     |                              |          |          |          |          |
|--------------------------------------|-----|---------------------|------------------------------|----------|----------|----------|----------|
| <i>A. citrina</i> sensu auct. amer.  | SYM | BW JLR 102106-1**   | United States, New Jersey    | HQ539679 | HQ539783 | HQ539993 | HQ539890 |
| <i>A. affin. citrina</i>             | SYM | BW_PNC              | United States, New Jersey    | HQ539662 | HQ539770 |          | HQ539873 |
| <i>A. clelandii</i>                  | SYM | PSC 2524            | Australia, South Australia   | HQ539680 | HQ539784 | HQ539994 | HQ539891 |
| <i>A. codinae</i>                    | FL  | RET 275-8           | France, Maine-et-Loire       | HQ539681 | HQ539785 | HQ539995 | HQ539892 |
| <i>A. cokeri</i>                     | SYM | BW_STF 090506-19*** | United States, Massachusetts | HQ539682 | HQ539786 | HQ539996 | HQ539893 |
| <i>A. conicobulbosa</i>              | SYM | PSC 1368            | Australia, South Australia   | HQ539683 | HQ539787 | HQ539997 | HQ539894 |
| <i>A. constricta</i>                 | SYM | BW_Mycoblitz IV.2   | United States, California    | HQ539684 | HQ539788 | HQ539998 | HQ539895 |
| <i>A. costaricensis</i>              | SYM | NY Halling 7684     | Costa Rica, Cartago Province | HQ539685 | HQ539789 | HQ539999 | HQ539896 |
| <i>A. crassiconus</i> Bas nom. prov. | SYM | RET 348-5           | Zambia, Copper Belt Province | HQ539686 | HQ539790 | HQ540000 | HQ539897 |
| <i>A. crenulata</i>                  | SYM | BW_PH82906-1***     | United States, Massachusetts | HQ539687 | HQ539791 | HQ540001 | HQ539898 |
| <i>A. daucipes</i>                   | SYM | RET 386-8           | United States, Pennsylvania  | HQ539688 | HQ539792 | HQ540002 | HQ539899 |
| <i>A. effusa</i>                     | SYM | PSC 2007            | Australia, South Australia   | HQ539689 | HQ539793 | HQ540003 | HQ539900 |
| <i>A. egregia</i>                    | SYM | NY 66253            | Australia, Queensland        | HQ539690 | HQ539794 | HQ540004 | HQ539901 |
| <i>A. eriophora</i>                  | SYM | RET 350-4           | Cambodia, Angkor             | HQ539672 | HQ539987 | HQ539883 |          |
| <i>A. affin. excelsa</i>             | SYM | Ge 816              | China, Sichuan               | HQ539691 | HQ539795 | HQ540005 | HQ539902 |
| <i>A. farinacea</i>                  | SYM | PSC 2529            | Australia, South Australia   | HQ539692 | HQ539796 | HQ540006 | HQ539903 |
| <i>A. flavoconia</i>                 | SYM | BW_PH22***          | United States, Massachusetts | HQ539693 | HQ539797 | HQ540007 | HQ539904 |
| <i>A. affin. flavoconia</i>          | SYM | PSMCC, #121         | United States, Oregon        | HQ539663 | HQ539771 |          | HQ539874 |
| <i>A. affin. flavorubens</i>         | SYM | BW_HF-FR***         | United States, Massachusetts | HQ539664 | HQ539772 | HQ539979 | HQ539875 |

|                                               |     |                |                                         |          |          |          |          |
|-----------------------------------------------|-----|----------------|-----------------------------------------|----------|----------|----------|----------|
| <i>A. flavorubens</i>                         | SYM | RET 295-9      | United States, New Jersey               | HQ539694 | HQ539798 | HQ540008 | HQ539905 |
| <i>A. friabilis</i>                           | SYM | PAM 06082601   | France, Savoie                          | HQ539695 | HQ539799 | HQ540009 | HQ539906 |
| <i>A. frostiana</i>                           | SYM | BW_PH37**      | United States, Massachusetts            | HQ539696 | HQ539800 | HQ540010 | HQ539907 |
| <i>A. fulva</i> sensu auct. amer..            | SYM | BW_PH82906-7** | United States, MA                       | HQ539697 | HQ539801 | HQ540011 | HQ539908 |
| <i>A. gracilior</i>                           | SYM | RET 342-2      | France, Charente-Maritime               | HQ539699 | HQ539803 | HQ540013 | HQ539910 |
| <i>A. grallipes</i>                           | FL  | RET 379-5      | Brazil, Paraná State                    | HQ539700 | HQ539804 | HQ540014 | HQ539911 |
| <i>A. hesleri</i>                             | SYM | RET 155-1      | United States, Mississippi              | HQ539701 | HQ539805 | HQ540015 | HQ539912 |
| <i>A. inopinata</i>                           | FL  | BW_GK2005-1    | United Kingdom, Suffolk                 | HQ539702 | HQ539806 | HQ540016 | HQ539913 |
| <i>A. jacksonii</i>                           | SYM | BW_PH17**      | United States, MA                       | HQ539703 | HQ539807 | HQ540017 | HQ539914 |
| <i>A. longipes</i>                            | SYM | RET 360-1      | United States, New Jersey               | HQ539704 | HQ539808 | HQ540018 | HQ539915 |
| <i>A. affin. luteofusca</i>                   | SYM | PSC 1093b      | Australia, South Australia              | HQ539705 | HQ539809 | HQ539916 |          |
| <i>A. affin. luteolovelata</i>                | SYM | PSC 2187       | Australia, South Australia              | HQ539706 | HQ539810 | HQ539917 |          |
| <i>A. manicata</i>                            | FL  | RET 387-4      | United States, Hawaii                   | HQ539708 | HQ539812 | HQ540020 | HQ539919 |
| <i>A. magniverrucata</i>                      | SYM | RET 387-10     | United States, California               | HQ539707 | HQ539811 | HQ540019 | HQ539918 |
| <i>A. marmorata</i>                           | SYM | AP_RoweAM2005  | United States, Hawaii                   | HQ539709 | HQ539813 | HQ540021 | HQ539920 |
| <i>A. multisquamosa</i>                       | SYM | BW_RP14**      | United States, New York                 | HQ539710 | HQ539814 | HQ540022 | HQ539921 |
| <i>A. murinoflammeum</i>                      | SYM | NY 66697       | Australia, Australian Capital Territory | HQ539711 | HQ539815 | HQ540023 | HQ539922 |
| <i>A. muscaria</i> subsp. <i>flavivolvata</i> | SYM | BW_Viess_01    | United States, California               | HQ539712 | HQ539816 | HQ540024 | HQ539923 |
| <i>A. muscaria</i> var. <i>guessowii</i>      | SYM | BW_STF090506-7 | United States, Massachusetts            | HQ539713 | HQ539817 | HQ539924 |          |

|                                        |     |                  |                                          |          |          |          |          |
|----------------------------------------|-----|------------------|------------------------------------------|----------|----------|----------|----------|
| <i>A. mutabilis</i>                    | SYM | RET 314-6        | United States, Florida                   | HQ539714 | HQ539818 | HQ540025 | HQ539925 |
| <i>A. nauseosa</i>                     | FL  | DPL 6117         | United States, Texas                     | HQ539715 | HQ539819 | HQ540026 | HQ539926 |
| <i>A. novinupta</i>                    | SYM | RET 093-10       | United States, Oregon                    | HQ539716 | HQ539820 | HQ540027 | HQ539927 |
| <i>A. ochrophylla</i>                  | SYM | PSC 1127         | Australia, South Australia, S. Australia | HQ539717 | HQ539821 | HQ540028 | HQ539928 |
| <i>A. onusta</i>                       | SYM | RET 297-3        | United States, New Jersey                | HQ539718 | HQ539822 | HQ540029 | HQ539929 |
| <i>A. parvipantherina</i>              | SYM | Yang 2490        | China, Yunnan                            | HQ539719 | HQ539823 | HQ540030 | HQ539930 |
| <i>A. peckiana</i>                     | SYM | RET 320-3        | United States, New York                  | HQ539720 | HQ539824 | HQ540031 | HQ539931 |
| <i>A. pelioma</i>                      | SYM | RET 321-4        | United States, Texas                     | HQ539721 | HQ539825 | HQ540032 | HQ539932 |
| <i>A. phalloides</i>                   | SYM | BW_JLR0226***    | United States, New Jersey                | HQ539722 | HQ539826 | HQ540033 | HQ539933 |
| <i>A. polypyramis</i>                  | SYM | RET 159-8        | United States, Maryland                  | HQ539723 | HQ539827 | HQ540034 | HQ539934 |
| <i>A. populiphila</i>                  | SYM | RET 266-9        | United States, Colorado                  | HQ539724 | HQ539828 | HQ540035 | HQ539935 |
| <i>A. praecox</i> Lamoureux nom. prov. | SYM | BW_PH082906-9*** | United States, Massachusetts             | HQ539725 | HQ539829 | HQ540036 | HQ539936 |
| <i>A. praelongispora</i>               | SYM | RET 314-8        | United States, Florida                   | HQ539726 | HQ539830 | HQ540037 | HQ539937 |
| <i>A. prairicola</i>                   | FL  | RET 266-1        | United States, Colorado                  | HQ539727 | HQ539831 | HQ540038 | HQ539938 |
| <i>A. proxima</i>                      | SYM | RET 290-10       | France, Gironde                          | HQ539728 | HQ539832 | HQ540039 | HQ539939 |
| <i>A. pruitii</i>                      | FL  | RET 343-2        | United States, Oregon                    | HQ539729 | HQ539833 | HQ540040 | HQ539940 |
| <i>A. pudica</i>                       | SYM | RET 344-4        | Zambia, Copper Belt Province             | HQ539730 | HQ539834 | HQ540041 | HQ539941 |
| <i>A. pulverulenta</i>                 | SYM | RET 348-9        | Zambia, Northern Province                | HQ539731 | HQ539835 | HQ540042 | HQ539942 |

|                                        |     |                  |                              |          |          |          |          |
|----------------------------------------|-----|------------------|------------------------------|----------|----------|----------|----------|
| <i>A. pyramidiferina</i>               | SYM | PSC 2441         | Australia, South Australia   | HQ539732 | HQ539836 | HQ540043 | HQ539943 |
| <i>A. rhopalopus</i>                   | SYM | RET 386-3        | United States, West Virginia | HQ539733 | HQ539837 | HQ540044 | HQ539944 |
| <i>A. sp-Ridley-2</i>                  | FL  | PDD 93780        | New Zealand, Hawke's Bay     | HQ539742 | HQ539846 | HQ540053 | HQ539953 |
| <i>A. ristichii</i>                    | SYM | BW_FR2_2006      | United States, Massachusetts | HQ539734 | HQ539838 | HQ540045 | HQ539945 |
| <i>A. rubescens</i>                    | SYM | RET 122-8        | Turkey, Trabzon              | HQ539735 | HQ539839 | HQ540046 | HQ539946 |
| <i>A. rubescens var. congolensis</i>   | SYM | RET 346-6        | Zambia, Copper Belt Province | HQ539736 | HQ539840 | HQ540047 | HQ539947 |
| <i>A. silvicola</i>                    | SYM | RET 382-4        | United States, California    | HQ539737 | HQ539841 | HQ540048 | HQ539948 |
| <i>A. singeri</i>                      | FL  | LIP 88.056       | France, Vendée               | HQ539738 | HQ539842 | HQ540049 | HQ539949 |
| <i>A. sinicoflava</i>                  | SYM | BW_PH061306-1*** | United States, Massachusetts | HQ539739 | HQ539843 | HQ540050 | HQ539950 |
| <i>A. smithiana</i>                    | SYM | RET 382-6        | United States, California    | HQ539740 | HQ539844 | HQ540051 | HQ539951 |
| <i>A. solitaria</i>                    | SYM | RET 298-1        | France, Gironde              | HQ539741 | HQ539845 | HQ540052 | HQ539952 |
| <i>A. affin. spissa</i>                | SYM | NY 47779         | Germany, Bavaria             | HQ539743 | HQ539847 | HQ540054 | HQ539954 |
| <i>A. strobiliformis</i>               | SYM | AP_10407-1       | Serbia, Belgrade             | HQ539744 | HQ539848 | HQ540055 | HQ539955 |
| <i>A. subalbida</i>                    | SYM | PSC 2509         | Australia, South Australia   | HQ539745 | HQ539849 | HQ540056 | HQ539956 |
| <i>A. subcaligata</i>                  | FL  | RET 266-6        | United States, Colorado      | HQ539746 | HQ539850 | HQ540057 | HQ539957 |
| <i>A. subcokeri</i> Tulloss nom. prov. | SYM | RET 097-3        | United States, New Jersey    | HQ539747 | HQ539851 | HQ540058 | HQ539958 |
| <i>A. subglobosa</i>                   | SYM | Yang 2488        | China, Yunnan                | HQ539748 | HQ539852 | HQ540059 | HQ539959 |
| <i>A. sublutea</i>                     | SYM | PSC 2401         | Australia, South Australia   | HQ539749 | HQ539853 | HQ540060 | HQ539960 |
| <i>A. subsolitaria</i>                 | SYM | RET 327-4        | United States, New Jersey    | HQ539750 | HQ539854 | HQ540061 | HQ539961 |

|                                  |     |                    |                              |          |          |          |          |
|----------------------------------|-----|--------------------|------------------------------|----------|----------|----------|----------|
| <i>A. tephrea</i> Bas nom. prov. | SYM | RET 378-9          | United States, New York      | HQ539751 | HQ539855 | HQ540062 | HQ539962 |
| <i>A. thiersii</i>               | FL  | DPL 7272           | United States, Missouri      | HQ539752 | HQ539856 | HQ540063 | HQ539963 |
| <i>A. umbrinella</i>             | SYM | PSC 1813           | Australia, South Australia   | HQ539753 | HQ539857 | HQ540064 | HQ539964 |
| <i>A. affin. vaginata</i>        | SYM | BW_PH82906-11***   | United States, Massachusetts | HQ539754 | HQ539858 | HQ540065 | HQ539965 |
| <i>A. verna</i>                  | SYM | RET 280-3          | France, Gironde              | HQ539755 | HQ539859 | HQ540066 |          |
| <i>A. affin. virosa</i>          | SYM | BW_HP082906-2***   | United States, Massachusetts | HQ539756 | HQ539860 | HQ540067 | HQ539966 |
| <i>A. vittadinii</i>             | FL  | RET 277-1          | France, Maine-et-Loire       | HQ539757 | HQ540068 | HQ539967 |          |
| <i>A. affin. volvata</i>         | SYM | BW_STF 090506-8*** | United States, Massachusetts | HQ539665 | HQ539773 | HQ539980 | HQ539876 |
| <i>A. wellsii</i>                | SYM | RET 001-5          | United States, Maine         | HQ539758 | HQ539861 | HQ540069 | HQ539968 |
| <i>A. westii</i>                 | SYM | BW_SH26            | United States, Texas         | HQ539759 | HQ539862 | HQ540070 | HQ539969 |
| <i>A. xylinivolv</i>             | SYM | NY 460959          | Costa Rica, San José         | HQ539760 | HQ539863 | HQ540071 | HQ539970 |
| <i>A. yuanaiana</i>              | SYM | Yang 2489          | China, Yunnan                | HQ539761 | HQ539864 | HQ540072 | HQ539971 |
| <i>A. zambiana</i>               | SYM | RET 343-10         | Zambia, Copper Belt Province | HQ539762 | HQ539865 | HQ540073 | HQ539972 |
| <i>Limacella glischra</i>        | FL  | NY 00815491        | Costa Rica, Puntarenas       | HQ539763 | HQ539866 | HQ540074 | HQ539973 |
| <i>L. affin. illinaita</i>       | FL  | SFSU HDT 54917     | United States, New Mexico    | HQ539764 | HQ539867 |          | HQ539974 |
| <i>Pluteus cervinus</i>          | FL  | F 88934            | United States, Texas         | HQ539765 | HQ539868 | HQ540075 | HQ539975 |
| <i>P. petasatus</i>              | FL  | NY 720956          | United States, New York      | HQ539766 | HQ539869 | HQ540076 | HQ539976 |
| <i>Volvariella volvacea</i>      | FL  | PSMCC, WC 439      | China                        | HQ539767 | HQ539870 | HQ540077 | HQ539977 |

\*Specimens used in this study were either obtained via loans from herbaria or were collected from the wild. We obtained permits (when necessary, see below) for field collections or collected from public lands where permits were not required. We never collected from privately owned or protected areas. None of the species we collected are endangered or protected.

\*\* See <http://www.amanitaceae.org/> for full listing of all currently recognized symbiotic and free-living *Amanita* species

\*\*\* These specimens were collected by the first author from the wild. Some specimens with “BW\_...” herbarium ID were collected from the following locations:

1) “BW\_PH...” and “BW\_HP” and “BW\_HF” = Harvard Forest, Petersham, Massachusetts (with permit issued from the Harvard Forest);

2) “BW\_STF...” = Stowe Town Forest, Stowe, Massachusetts (no permit required);

3) “BW\_JLR” = Jake’s Landing Road, Belleplain State Forest (with permit issued from the New Jersey State Park Service);

4) “BW\_SH..” = Big Thicket National Preserve, Kountze, Texas (with permit issued by the National Parks Service);

and

5) “BW\_RP..” = Rocky Point Natural Resources Conservation Area, Rocky Point, New York (with permit issued from the New York State Department of Conservation)
