# Supplementary material
Source: publisher figshare collection journal article supplement (https://plos.figshare.com/articles/dataset/_/122577)
Supplement: Supplementary file 1 [file 1 › Table_S2.pdf]

**Table S2: Primers used to amplify functional genes**

|                                                                  | Primer name         | Sequence                   | Targeted Protein Sequence |
|------------------------------------------------------------------|---------------------|----------------------------|---------------------------|
| <b>Celulase gene screens</b>                                     |                     |                            |                           |
| <b>Endoglucanase (<i>egl</i>)</b>                                | endoglucGH5f        | ATYTTTGATGTYATGAAYGARCC    | IFDVMNEP                  |
|                                                                  | endoglucGH5r        | CCACCAIGGWCCWGCIGC         | WAGPWW                    |
| <b>Cellobiohydrolase I (<i>cbhl</i>)</b>                         | fungCBHlf*          | ACCAAYTGCTAYACIRGYAA       | TNCYTGN                   |
|                                                                  | fungCBHlr           | GCYTCCCAIATRTCCATC         | EMDIWEA                   |
| <b><math>\beta</math>-glucosidase (<i>bg1</i>)</b>               | inbetaglucGH3f      | GGHGGWGGITCIGCIGCVCT       | GGGSAAL                   |
|                                                                  | inbetaglucGH3r      | TGICGIGTCCAGTTRTCIATAC     | VIDNWTR                   |
| <b>Extracellular Aspartic Protease</b>                           |                     |                            |                           |
|                                                                  | AsProtF1.2          | GAYCAIGGCTCITCIGAYCTITGG   | DTGSSDLW                  |
|                                                                  | AsProtR2.3          | GTGCCINWRTCGATIAYIGT       | TIIDSGT                   |
| <b>RT-PCR primers</b>                                            |                     |                            |                           |
| <b><math>\beta</math>-glucosidase (<i>bg1</i>)</b>               |                     |                            |                           |
| <b><i>Amanita thiersii</i></b>                                   | AthintBGf           | GGCGGTGGGTCTGGCGGCGCTGAAAG | GGGSAAL                   |
|                                                                  | AallBGr             | TGGCGGGTCCAGTTGTCGATGAC    | VIDNWTR                   |
| <b><i>Amanita cokeri</i></b>                                     | AcokintBGf          | GGTGGTGGGTCTGGCGGCCCTGACC  | GGGSAAL                   |
|                                                                  | AallBGr (see above) |                            |                           |
| <b><i>Amanita crenulata</i></b>                                  | AmuscintBGf         | GGTGGAGGGTCTGGCGGCGCTTAAAC | GGGSAAL                   |
|                                                                  | AallBGr (see above) |                            |                           |
| <b>elongation-factor 1 alpha (<i>ef1<math>\alpha</math></i>)</b> |                     |                            |                           |
| <b><i>Amanita thiersii</i></b>                                   | AthefF              | CAAGATGGACACTACTAAGTGGAG   | RWTLLSG                   |
|                                                                  | AallefR             | CCGATACCACCGATCTTGTAGAC    | RLQDRWYR                  |
| <b><i>Amanita cokeri</i></b>                                     | AcokefF             | CAAGATGGATACCACCAAATGGAG   | RWIPPNG                   |
|                                                                  | AallefR (see above) |                            |                           |
| <b><i>Amanita crenulata</i></b>                                  | AcrenefF            | CAAGATGGATACCCTAAGTGGAG    | RWIPLSG                   |
|                                                                  | AallefR (see above) |                            |                           |

\* Previously published primer pair (Edwards et al. 2008)
