# Supplementary material
Source: publisher figshare collection journal article supplement (https://plos.figshare.com/articles/dataset/_/122577)
Supplement: Supplementary file 1 [file 1 › Table_S3.pdf]

**Table S3: Cultures used in experimental assessment of saprotrophy**

| Species Name                                              | Strain ID            | Source                                                                                 | GenBank<br>Accession # of<br>nuclSU<br>Sequence |
|-----------------------------------------------------------|----------------------|----------------------------------------------------------------------------------------|-------------------------------------------------|
| <i>Amanita muscaria</i> var <i>guessowii</i><br>(type 1)* | PS #283              | Penn State Spawn Collection, #283 (from forest in United States,<br>Pennsylvania)      | HQ593121                                        |
| <i>Amanita muscaria</i> var <i>guessowii</i><br>(type 2)  | Koide BX008          | Mushroom collected by Dr. Roger Koide, (from forest in United States,<br>Pennsylvania) | HQ593120                                        |
| <i>Amanita crenulata</i>                                  | MM 9.01.06           | Mushroom collected by authors, United States, Massachusetts                            | HQ593117                                        |
| <i>Amanita</i> affin. <i>flavoconia</i>                   | PS 35                | Penn State Spawn Collection, #35; (isolated in United States,<br>Oregon)               | HQ539663                                        |
| <i>Amanita</i> affin. <i>brunnescens</i>                  | BW HF10C             | Mushroom collected by authors, United States, Massachusetts                            | HQ539661                                        |
| <i>Amanita</i> affin. <i>citrina</i>                      | BW PNC               | Mushroom collected by authors, United States, New Jersey                               | HQ539662                                        |
| <i>Amanita cinereoconia</i>                               | BW_PSF               | Mushroom collected by authors, United States, New Hampshire                            | HQ593118                                        |
| <i>Amanita polypyraxis</i>                                | BW_CC                | Mushroom collected by authors, United States, Massachusetts                            | HQ593122                                        |
| <i>Amanta cokeri</i>                                      | BW_STF 090506-<br>19 | Mushroom collected by authors, United States, Massachusetts                            | HQ593113                                        |
| <i>Amanita inopinata</i>                                  | Kibby_2008           | Mushroom collected by authors, United Kingdom, Suffolk                                 | HQ593116                                        |
| <i>Amanita thiersii</i>                                   | SKay4041_het         | Mushroom provided to authors by Sherry Kay, United States, Kansas                      | HQ593114                                        |
| <i>Amanita manicata</i>                                   | Hemmes_2008          | Mushroom collected by authors, United States, Hawaii                                   | HQ593115                                        |
| <i>Volvariella bombycina</i>                              | PS# WC 427           | Penn State Spawn Collection, WC 427 (isolated from wood, United<br>States, Michigan)   | HQ593119                                        |
| <i>Volvariella volvacea</i>                               | PS# WC 439           | Penn State Spawn Collection, WC 439 (isolated in China)                                | HQ539767                                        |

\*The two *Amanita muscaria* var. *guessowii* strains represent two genetically distinct types based on SNPs identified in the ITS sequences of these strains. They are placed in the I/A NE US clade of the *Amanita muscaria* species complex identified by Geml J, Tulloss RE, Laursen GA, Sazanova NA, Taylor DL. 2008. Evidence for strong inter- and intracontinental phylogeographic structure in *Amanita muscaria*, a wind-dispersed ectomycorrhizal basidiomycete. Mol Phylogenet Evol 48(2):694-701.
